# Supplementary material for: Peptide template effects for the synthesis and catalytic application of Pdnanoparticle networks
Source: Royal Society of Chemistry journal article supplement (doi:10.1039/b922018f), 2009-12-24
Supplement: b922018f.pdf [file b922018f.pdf]

**Supporting Information**

October 20, 2009

**Peptide Template Effects for the Synthesis and Catalytic Application of Pd Nanoparticle Networks**

Anshuman Jakhmola, Rohit Bhandari, Dennis B. Pacardo, and Marc R. Knecht\*

(5 pages)

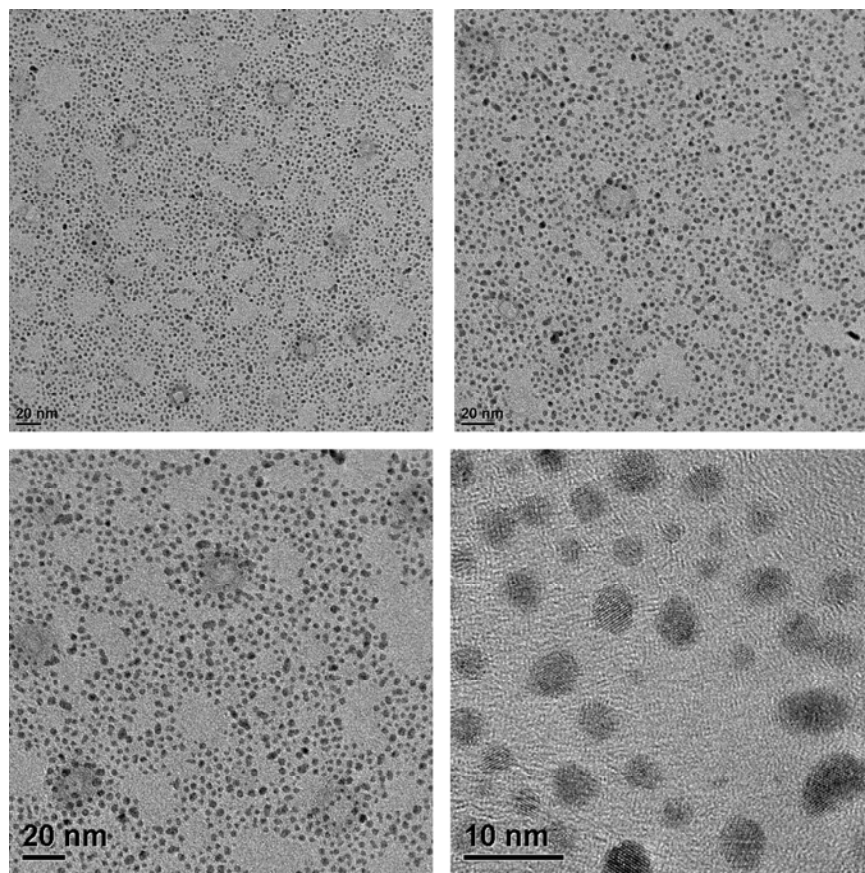

**Fig. S1.** Additional TEM and HRTEM micrographs of the Pd nanostructures prepared with a Pd:peptide ratio of 60.

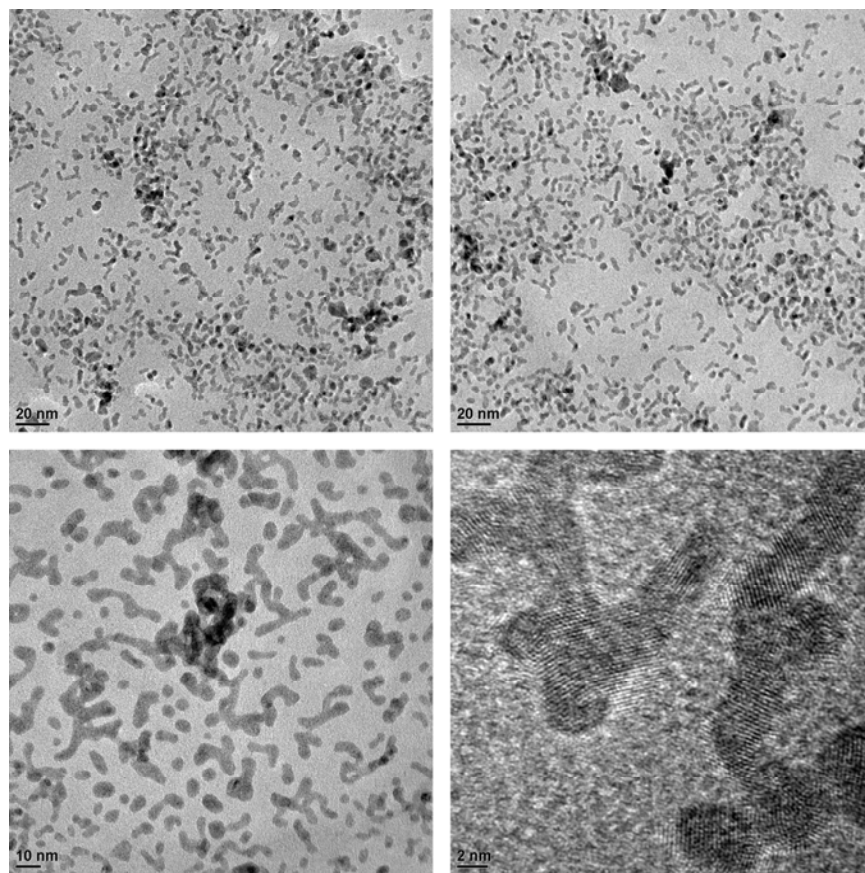

**Fig. S2.** Additional TEM and HRTEM micrographs of the Pd nanostructures prepared with a Pd:peptide ratio of 90.

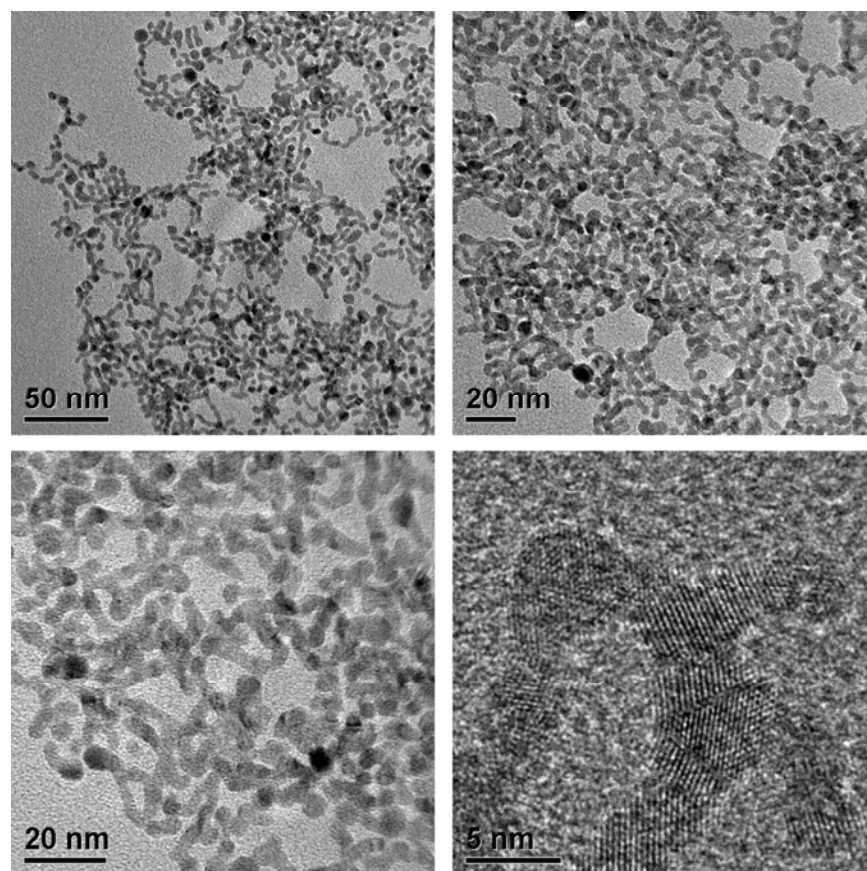

**Fig. S3.** Additional TEM and HRTEM micrographs of the Pd nanostructures prepared with a Pd:peptide ratio of 120.

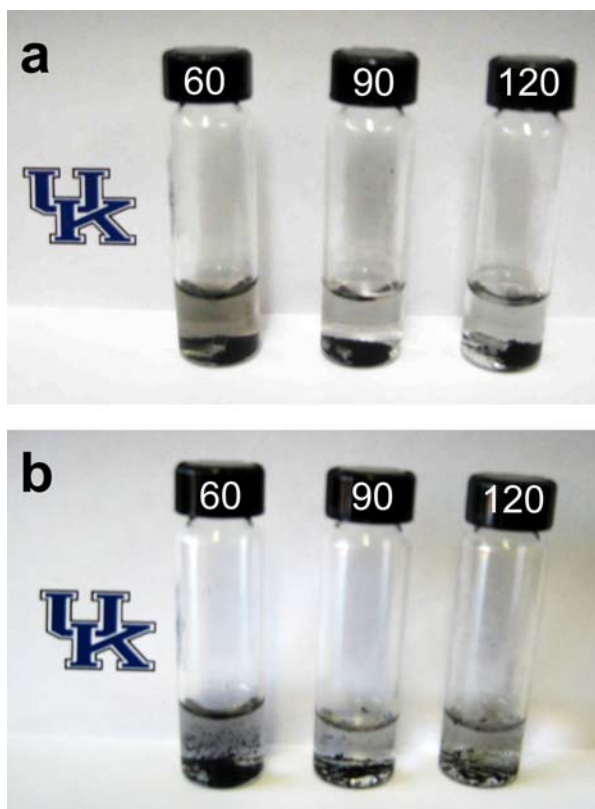

**Figure S4.** Control analysis of the synthetic procedure. In part (a) no peptide was present in the reaction mixture, while in part (b), a nonspecific peptide was substituted for the R5. In all cases, a black precipitate was formed at the appropriate reaction concentrations used in the manuscript. This suggests that the formation of the NPN structure is dependent upon the R5 self-assembled framework.
